# Supplementary material for: A novel method for simultaneously screening superoxide anion scavengers and xanthine oxidase inhibitors using hydroethidine as a fluorescent probe coupled with high-performance liquid chromatography-mass spectrometry
Source: Royal Society of Chemistry journal article supplement (doi:10.1039/c9ay02059d), 2019-11-22
Supplement: c9ay02059d1.pdf [file c9ay02059d1.pdf]

| 5min          | UA    | HE    | 2-OH-E <sup>+</sup> | Table S1<br>Stability of<br>HPLC-MS<br>method |
|---------------|-------|-------|---------------------|-----------------------------------------------|
| 1             | 0.18  | 0.83  | 1.44                |                                               |
| 2             | 0.23  | 0.72  | 1.30                |                                               |
| 3             | 0.24  | 0.66  | 1.17                |                                               |
| 4             | 0.24  | 0.63  | 1.24                |                                               |
| average value | 0.22  | 0.71  | 1.29                |                                               |
| SD            | 0.03  | 0.09  | 0.11                |                                               |
| RSD%          | 13.13 | 12.35 | 8.74                |                                               |
